# Supplementary material for: Decreased serum albumin level indicates poor prognosis of COVID-19 patients: hepatic injury analysis from 2,623 hospitalized cases
Source: Springer Nature journal article supplement (doi:10.1007/s11427-020-1733-4), 2020-06-18
Supplement: 11427_2020_1733_MOESM1_ESM.pdf [file 11427_2020_1733_MOESM1_ESM.pdf]

Table S1 Plasma inflammatory cytokine levels.

|                      |                   | Non-Critical            | Critical                  | Death                     | P      |
|----------------------|-------------------|-------------------------|---------------------------|---------------------------|--------|
| IL-2R (median (IQR)) | At admission test | 466.00 (306.00, 696.00) | 828.00 (539.00, 1201.75)  | 1091.00 (683.75, 1617.75) | <0.001 |
|                      | At second test    | 628.50 (410.75, 853.75) | 1016.50 (634.50, 1379.50) | 1189.00 (827.00, 1524.00) | <0.001 |
| IL-8 (median (IQR))  | At admission test | 9.90 (6.12, 17.30)      | 17.55 (10.38, 30.00)      | 24.30 (15.10, 65.10)      | <0.001 |
|                      | At second test    | 14.70 (9.60, 26.37)     | 21.90 (13.48, 35.70)      | 42.20 (21.90, 63.40)      | <0.001 |
| TNF-a (median (IQR)) | At admission test | 7.80 (6.00, 9.90)       | 9.30 (7.50, 12.72)        | 11.15 (8.45, 15.50)       | <0.001 |
|                      | At second test    | 8.00 (5.88, 10.35)      | 11.40 (8.62, 14.80)       | 13.20 (7.90, 19.90)       | <0.001 |
| IL-10 (median (IQR)) | At admission test | 2.50 (2.50, 5.10)       | 5.20 (2.50, 9.17)         | 10.30 (6.85, 17.90)       | <0.001 |
|                      | At second test    | 2.50 (2.50, 6.15)       | 6.35 (2.50, 12.77)        | 8.40 (5.30, 16.50)        | <0.001 |
| IL-6 (median (IQR))  | At admission test | 4.54 (2.00, 15.58)      | 25.96 (11.11, 52.17)      | 63.03 (38.33, 163.55)     | <0.001 |
|                      | At second test    | 9.96 (2.48, 30.63)      | 27.29 (8.71, 80.47)       | 77.65 (29.54, 180.37)     | <0.001 |

Data are shown as median (IQR). p values were calculated by Kruskal–Wallis rank test. The cytokines including IL-6, IL-8, IL-10, IL-2R and TNF-a at the admission and after admission were compared among non-critical, critical and death groups. If the value of biomarkers below the lower reference limit, half of the lower reference value was used.
